# Supplementary material for: Hybridization of Co3S4 and Graphitic Carbon Nitride Nanosheets for High-performance Nonenzymatic Sensing of H2O2
Source: MDPI journal article supplement (doi:10.3390/bios13010108), 2023-01-07
Supplement: s1 [file s1]

## Supporting Information

# Hybridization of Co<sub>3</sub>S<sub>4</sub> and Graphitic Carbon Nitride Nanosheets for High-performance Nonenzymatic Sensing of H<sub>2</sub>O<sub>2</sub>

Asha Ramesh<sup>1</sup>, Ajay Ajith<sup>2</sup>, Neeraja Sinha Gudipati<sup>1</sup>, Siva Rama Krishna Vanjari<sup>3</sup>,  
S. Abraham John<sup>2</sup>, Vasudevanpillai Biju<sup>4</sup>, and Ch Subrahmanyam<sup>1,\*</sup>

<sup>1</sup>Department of Chemistry, Indian Institute of Technology Hyderabad, Kandi, Sangareddy, 502285, Telangana, India

<sup>2</sup>Centre for Nanoscience and Nanotechnology, Department of Chemistry, The Gandhigram Rural Institute, Gandhigram, Dindigul, 624302, Tamilnadu, India

<sup>3</sup>Department of Electrical Engineering, Indian Institute of Technology Hyderabad, Kandi, Sangareddy, 502285, Telangana, India

<sup>4</sup>Research Institute for Electronic Science Hokkaido University, Sapporo, Hokkaido 001-0020, Japan

\* Correspondence: csbubu@chy.iith.ac.in

### 1. Materials

Cobalt(II) nitrate hexahydrate [Co(NO<sub>3</sub>)<sub>2</sub>· 6H<sub>2</sub>O, Sigma-Aldrich, 99.5%], Thiourea [Merck, 99%], Ethylenediamine [Alfa Aesar, 99%], Melamine[Alfa Aesar, 99%]. All the chemicals were of analytical grade and used without further purification.

### 2. Characterization

Crystallographic properties of the as-prepared materials were characterized via Powder X-ray diffraction using a Rigaku SmartLab X-ray diffractometer with Cu K $\alpha$  ( $\lambda$ =1.54 Å) radiation and a Ni filter over a Bragg's angle of 10-80°. The chemical composition of the materials and oxidation states of the elements were examined by X-ray photoelectron spectroscopy (XPS) using AXIS Supra-Kratos analytical spectrophotometer with a monochromatic X-ray source, Al K $\alpha$ , of 1486.6 eV. The morphological studies of the materials were performed by scanning electron microscopy (SEM) using VEGA3 TESCAN, Czech Republic. Elemental analysis of the samples was further performed by energy-dispersive X-ray spectroscopy (EDS) during SEM characterization. JEOL JEM F200 transmission electron microscope was used to record TEM images and SAED patterns of the materials at an acceleration voltage of 200 kV. Absorption studies were performed in UV-Vis spectrophotometer (T90+, PG Instruments). Photoluminescence (PL) studies were performed using HORIBA Scientific FluoroMax-4 spectrofluorometer.

### 3. Electrochemical studies

Electrochemical studies were carried out using a three-electrode configuration in CHI electrochemical workstation (Model 643B, Austin, TX). The three electrodes used are a material-coated glassy carbon electrode as the working, a Pt wire as the counter, and

Ag/AgCl as the reference electrode. A phosphate buffer solution (PBS) of pH 7.2 was used as an electrolyte for the electrochemical studies. Cyclic voltammograms are recorded after deaerating the solution with nitrogen purging. The behavior towards the  $\text{Fe}^{3+}/\text{Fe}^{2+}$  couple and the electrochemical impedance spectra of the modified electrodes were recorded in 0.1 M KCl containing 1mM of  $\text{K}_3(\text{Fe}(\text{CN})_6)$  and 1mM of  $\text{K}_4\text{Fe}(\text{CN})_6$ .

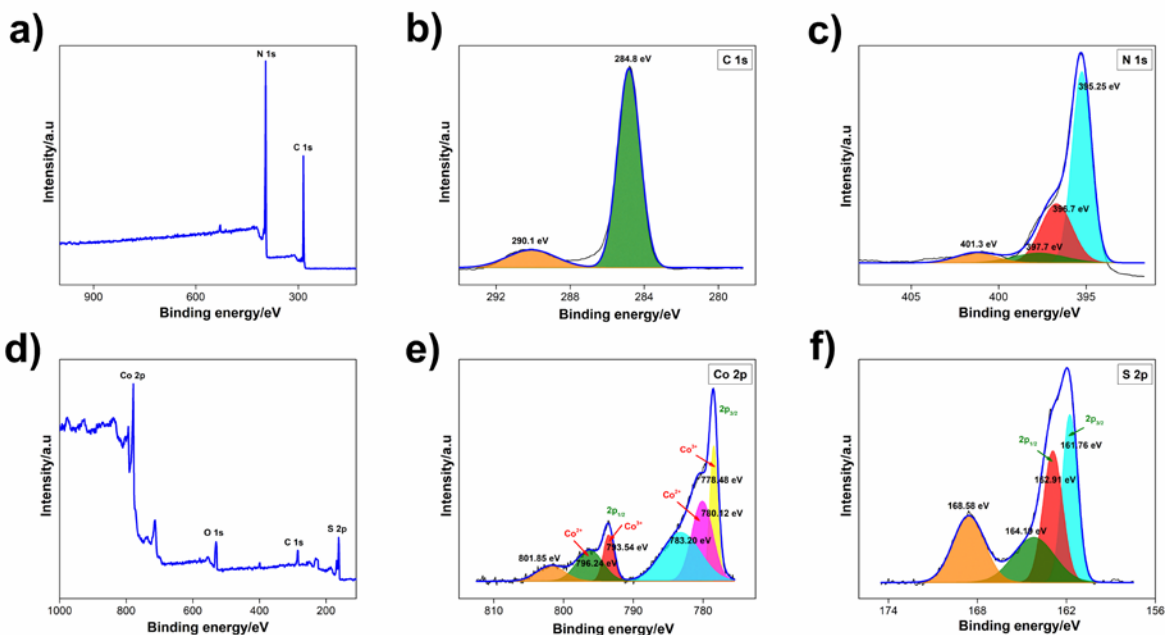

**Figure S1.** XPS spectra of GCNNS, (a) survey scan, high-resolution spectra of (b) C 1s and (c) N1s. XPS spectra of  $\text{Co}_3\text{S}_4$ , (d) survey scan, high-resolution spectra of (e) Co 2p and (f) S 2p.

**Table S1.** Comparison of the binding energy of the core levels in  $\text{Co}_3\text{S}_4$ , GCNNS, and  $\text{Co}_3\text{S}_4/\text{GCNNS}$ .

| Core level | Material                             | Binding Energy (eV)                            |
|------------|--------------------------------------|------------------------------------------------|
| C 1s       | GCNNS                                | 284.8, 290.1                                   |
|            | $\text{Co}_3\text{S}_4/\text{GCNNS}$ | 284.8, 288.0                                   |
| N 1s       | GCNNS                                | 395.25, 396.7, 397.7, 401.3                    |
|            | $\text{Co}_3\text{S}_4/\text{GCNNS}$ | 398.4, 399.3, 400.5, 404.6                     |
| Co 2p      | $\text{Co}_3\text{S}_4$              | 778.48, 793.54, 780.12, 796.24, 783.20, 801.85 |
|            | $\text{Co}_3\text{S}_4/\text{GCNNS}$ | 783.3, 798.26, 780.7, 796.1, 804.2             |
|            | $\text{Co}_3\text{S}_4$              | 161.76, 162.91, 164.19, 168.58                 |

|      |                                       |                             |
|------|---------------------------------------|-----------------------------|
| S 2p | Co <sub>3</sub> S <sub>4</sub> /GCNNS | 161.9, 164.9, 166.8, 171.48 |
|------|---------------------------------------|-----------------------------|

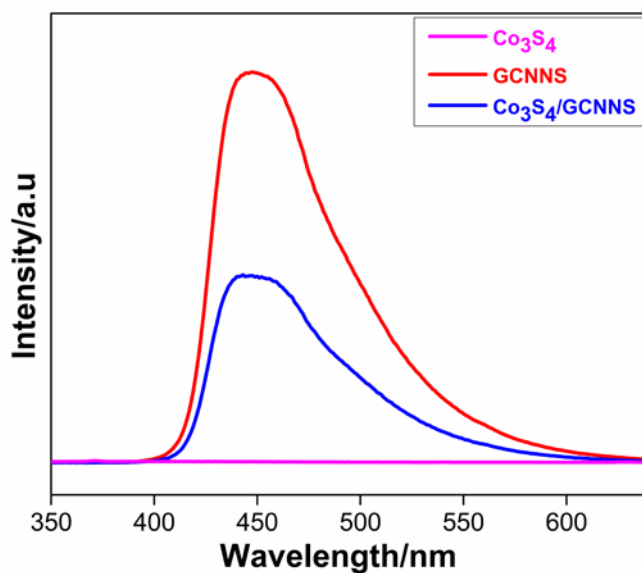

**Figure S2.** Comparison of PL spectra of Co<sub>3</sub>S<sub>4</sub>, GCNNS, and Co<sub>3</sub>S<sub>4</sub>/GCNNS measured at an excitation wavelength of 330 nm.

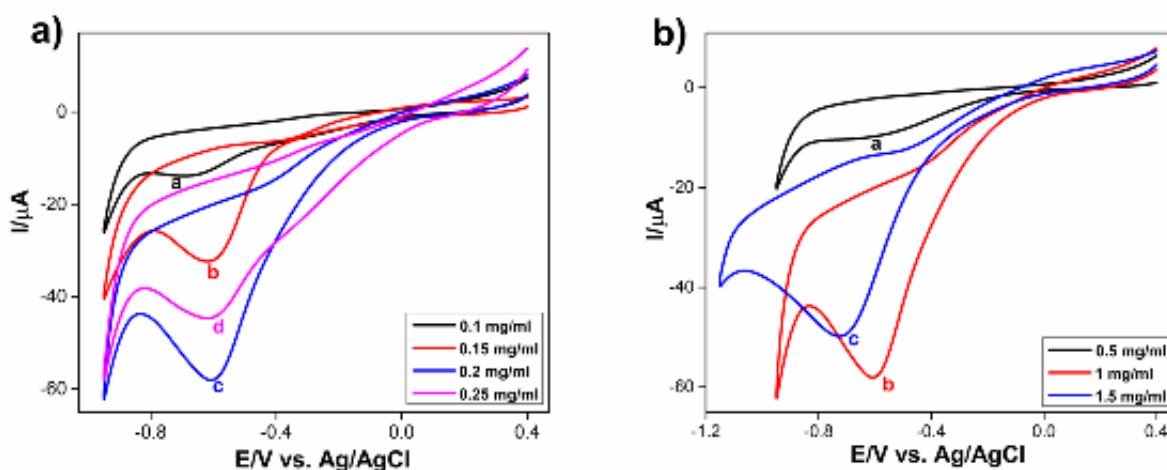

**Figure S3.** (a) CVs obtained for the reduction of 1 mM H<sub>2</sub>O<sub>2</sub> at 1 mg/mL GCNNS containing various amounts of Co<sub>3</sub>S<sub>4</sub>; 0.1, 0.15, 0.2, and 0.25 mg/mL in 0.2 M PBS of pH 7.2, (b) CVs obtained for the reduction of 1 mM H<sub>2</sub>O<sub>2</sub> at 0.2 mg/mL Co<sub>3</sub>S<sub>4</sub> containing various amount of GCNNS of 0.5, 1 and 1.5 mg/mL in 0.2 M PBS of pH 7.2.

**Table S2.** Comparison of related non-enzymatic H<sub>2</sub>O<sub>2</sub> sensors with the performance of Co<sub>3</sub>S<sub>4</sub>/GCNNS.

| Material                                         | Technique                | Linear range (μM) | LOD (μM) | Sensitivity (μAμM <sup>-1</sup> cm <sup>-2</sup> ) | Reference |
|--------------------------------------------------|--------------------------|-------------------|----------|----------------------------------------------------|-----------|
| TiO <sub>2</sub> /SiO <sub>2</sub>               | Phosphorescence          | 7 - 70000         | 0.16     | -                                                  | [1]       |
| Graphene-CdS                                     | Electrochemiluminescence | 5 - 1000          | 1.7      | -                                                  | [2]       |
| MoS <sub>2</sub>                                 | Fluorescence             | 2 - 20            | -        | -                                                  | [3]       |
| Porphyrin Iron-grafted mesoporous silica         | Colorimetry              | 293 - 8800        | 67       | -                                                  | [4]       |
| Pt NPs@fibrous silica                            | Optical sensor           | 1 - 10000         | 15       | -                                                  | [5]       |
| Co <sub>3</sub> O <sub>4</sub>                   | Amperometry              | 0.4 - 2200        | 0.105    | 0.96                                               | [6]       |
| Au/Cu                                            | Amperometry              | 20 - 100          | 0.073    | 0.94                                               | [7]       |
| Cu <sub>2</sub> S@Co <sub>3</sub> S <sub>4</sub> | CV                       | -                 | -        | -                                                  | [8]       |
| GCN hollow spheres                               | CV                       | 0.150 - 1.8       | 26.48    | 0.35                                               | [9]       |
| ZnO/GCN                                          | Chronoamperometry        | 5 - 200           | 2.0      | -                                                  | [10]      |
| CuO/GCN                                          | DPV                      | 0.5 - 50          | 0.31     | 3.327                                              | [11]      |
| ZnFe <sub>2</sub> O <sub>4</sub> /GCN            | Amperometry              | 5 - 200           | 1        | 0.19                                               | [12]      |
| Co <sub>3</sub> S <sub>4</sub> /GCNNS            | Amperometry              | 0.01 - 1500       | 0.070    | 1.160                                              | This work |

## References

1. Shu, X.; Chen, Y.; Yuan, H.; Gao, S.; Xiao, D. H<sub>2</sub>O<sub>2</sub> Sensor Based on the Room-Temperature Phosphorescence of Nano TiO<sub>2</sub> /SiO<sub>2</sub> Composite. *Anal. Chem.* **2007**, *79*, 3695–3702. <https://doi.org/10.1021/ac0624142>.
2. Wang, K.; Liu, Q.; Wu, X.-Y.; Guan, Q.-M.; Li, H.-N. Graphene enhanced electrochemiluminescence of CdS nanocrystal for H<sub>2</sub>O<sub>2</sub> sensing. *Talanta* **2010**, *82*, 372–376. <https://doi.org/10.1016/j.talanta.2010.04.054>.
3. Gan, Z.; Gui, Q.; Shan, Y.; Pan, P.; Zhang, N.; Zhang, L. Photoluminescence of MoS<sub>2</sub> quantum dots quenched by hydrogen peroxide: A fluorescent sensor for hydrogen peroxide. *J. Appl. Phys.* **2016**, *120*, 104503. <https://doi.org/10.1063/1.4962318>.

4. Zhu, P.; Xu, Z.; Cai, L.; Chen, J. Porphyrin Iron-Grafted Mesoporous Silica Composites for Drug Delivery, Dye Degradation and Colorimetric Detection of Hydrogen Peroxide. *Nanoscale Res. Lett.* **2021**, *16*, 41. <https://doi.org/10.1186/s11671-021-03501-6>.
5. Ding, L.; Chen, S.; Zhang, W.; Zhang, Y.; Wang, X. Fully Reversible Optical Sensor for Hydrogen Peroxide with Fast Response. *Anal. Chem.* **2018**, *90*, 7544–7551. <https://doi.org/10.1021/acs.analchem.8b01159>.
6. Wang, M.; Jiang, X.; Liu, J.; Guo, H.; Liu, C. Highly sensitive H<sub>2</sub>O<sub>2</sub> sensor based on Co<sub>3</sub>O<sub>4</sub> hollow sphere prepared via a template-free method. *Electrochim. Acta* **2015**, *182*, 613–620. <https://doi.org/10.1016/j.electacta.2015.08.116>.
7. Gowthaman, N.; Shankar, S.; John, S.A. Substrate catalyzed formation of Au-Cu bimetallic nanoparticles as electrocatalyst for the reduction of dioxygen and hydrogen peroxide. *J. Electroanal. Chem.* **2018**, *812*, 37–44. <https://doi.org/10.1016/j.jelechem.2018.01.053>.
8. Chen, H.; Cai, J.; Yang, J.; Zhong, Z.; Ma, M.; Deng, W.; Tan, Y.; Xie, Q. Synergistic electrocatalysis of Cu<sub>2</sub>S@Co<sub>3</sub>S<sub>4</sub> core-shell heterostructures toward H<sub>2</sub>O<sub>2</sub> reduction and their application for sensitive immunosensing of alpha fetoprotein. *Sens. Actuators B Chem.* **2021**, *348*, 130703. <https://doi.org/10.1016/j.snb.2021.130703>.
9. Puentes-Prado, E.; Gutiérrez-Granados, S.; Gómez-Solís, C.; Ramírez-García, G. Enhanced photo-electrochemical response of screen-printed electrodes based on g-C<sub>3</sub>N<sub>4</sub> hollow spheres and other morphologies for sensing applications. *FlatChem* **2022**, *35*, 100412. <https://doi.org/10.1016/j.flatc.2022.100412>.
10. Liu, H.; Zhang, Y.; Dong, Y.; Chu, X. Synthesis of ZnO/g-C<sub>3</sub>N<sub>4</sub> Nanocomposite and Its Electrochemical Application in Hydrogen Peroxide Detection. *Russ. J. Electrochem.* **2021**, *57*, 808–815. <https://doi.org/10.1134/S1023193520120125>.
11. Atacan, K.; Özacar, M. Construction of a non-enzymatic electrochemical sensor based on CuO/g-C<sub>3</sub>N<sub>4</sub> composite for selective detection of hydrogen peroxide. *Mater. Chem. Phys.* **2021**, *266*, 124527. <https://doi.org/10.1016/j.matchemphys.2021.124527>.
12. Ye, M.; Yang, C.; Sun, Y.; Wang, J.; Wang, D.; Zhao, Y.; Zhu, Z.; Liu, P.; Zhu, J.; Li, C.; et al. ZnFe<sub>2</sub>O<sub>4</sub>/Graphitic Carbon Nitride Nano/Microcomposites for the Enhanced Electrochemical Sensing of H<sub>2</sub>O<sub>2</sub>. *ACS Appl. Nano Mater.* **2022**, *5*, 10922–10932. <https://doi.org/10.1021/acsanm.2c02204>.
